# Supplementary material for: Effect of Online Home-Based Training on Functional Capacity and Strength in Two CKD Patients: A Case Study
Source: MDPI journal article supplement (doi:10.3390/healthcare10030572), 2022-03-18
Supplement: s1 [file s1]

Table S1: Schedule exercises' example of the online training program

| SCHEDULE EXERCISES                                      |                                                                       |  |  |  |
|---------------------------------------------------------|-----------------------------------------------------------------------|--|--|--|
| WARM-UP                                                 |                                                                       |  |  |  |
| DURATION: 15'                                           | AIM: Mobility, Proprioceptive, Balance Ex.<br>EQUIPMENT: Wands, Chair |  |  |  |
| EXERCISE                                                | Repetitions                                                           |  |  |  |
| Circumduction of Shoulder – Calf Raise                  | 8-10                                                                  |  |  |  |
| Dynamic Hip Mobility on Sagittal and Frontal Plane      | 8-10 + 8-10                                                           |  |  |  |
| Circumduction of Arms – Half Squat                      | 8-10                                                                  |  |  |  |
| Flex-Extensions of Arms + Wands                         | 8-10                                                                  |  |  |  |
| Walking on Heel, Forefoot, Tandem                       | 1'-2'                                                                 |  |  |  |
| Monopodal Balance + Chair and Dynamic Balance Y-Balance | 10"-30"                                                               |  |  |  |

  

| STRENGTH PHASE                       |                                                                    |        |        |        |
|--------------------------------------|--------------------------------------------------------------------|--------|--------|--------|
| DURATION: 20'- 30'                   | MUSCLE GROUPS: Total body, Core<br>EQUIPMENT: Thera Band (TB), Mat |        |        |        |
| CIRCUIT (1) x 3 set                  | Week 1                                                             | Week 2 | Week 3 | Week 4 |
| Sumo squat + TB                      | 10                                                                 | 10     | 15     | 15     |
| Bent over row + TB                   | 10                                                                 | 10     | 15     | 15     |
| Romanian Dead Lift + TB              | 10                                                                 | 10     | 15     | 15     |
| Rest                                 | 60"                                                                | 45"    | 45"    | 30"    |
| CIRCUIT (2) x 3 set                  | Week 1                                                             | Week 2 | Week 3 | Week 4 |
| Inclined Push up                     | 10                                                                 | 10     | 15     | 15     |
| Backward Lunges – Lateral Raise + TB | 8+8                                                                | 8+8    | 10+10  | 10+10  |
| Inclined walking plank Into Squat    | 10                                                                 | 10     | 15     | 15     |
| Rest                                 | 60"                                                                | 45"    | 45"    | 30"    |

| AEROBIC PHASE            |                                                                              |
|--------------------------|------------------------------------------------------------------------------|
| <b>DURATION:</b> 10'-15' | <b>INTENSITY:</b> $\approx$ 65-70% of HRR<br><b>MUSIC:</b> $\approx$ 128 bpm |
| STEPS                    | Repetitions                                                                  |
| March in place with Arms | 3x8                                                                          |
| Sidestep                 | 3x8                                                                          |
| Knee Up                  | 3x8                                                                          |
| Leg Curl                 | 3x8                                                                          |
| Kick and Punge           | 3x8                                                                          |
| Lounges                  | 3x8                                                                          |
| V-Step                   | 3x8                                                                          |
| March in place with Arms | 3x8                                                                          |

| COOL-DOWN               |                                                                      |
|-------------------------|----------------------------------------------------------------------|
| <b>DURATION:</b> 5'-10' | <b>AIM:</b> Stretching of all muscle groups involved in the protocol |
